# Supplementary material for: Positive Regulation of S-adenosylmethionine on Chondrocytic Differentiation via Stimulation of Polyamine Production and the Gene Expression of Chondrogenic Differentiation Factors
Source: Preprints.org preprint supplement (doi:10.20944/preprints202311.0304.v1), 2023-11-06
Supplement: Supplementary file 2 [file supplementary]

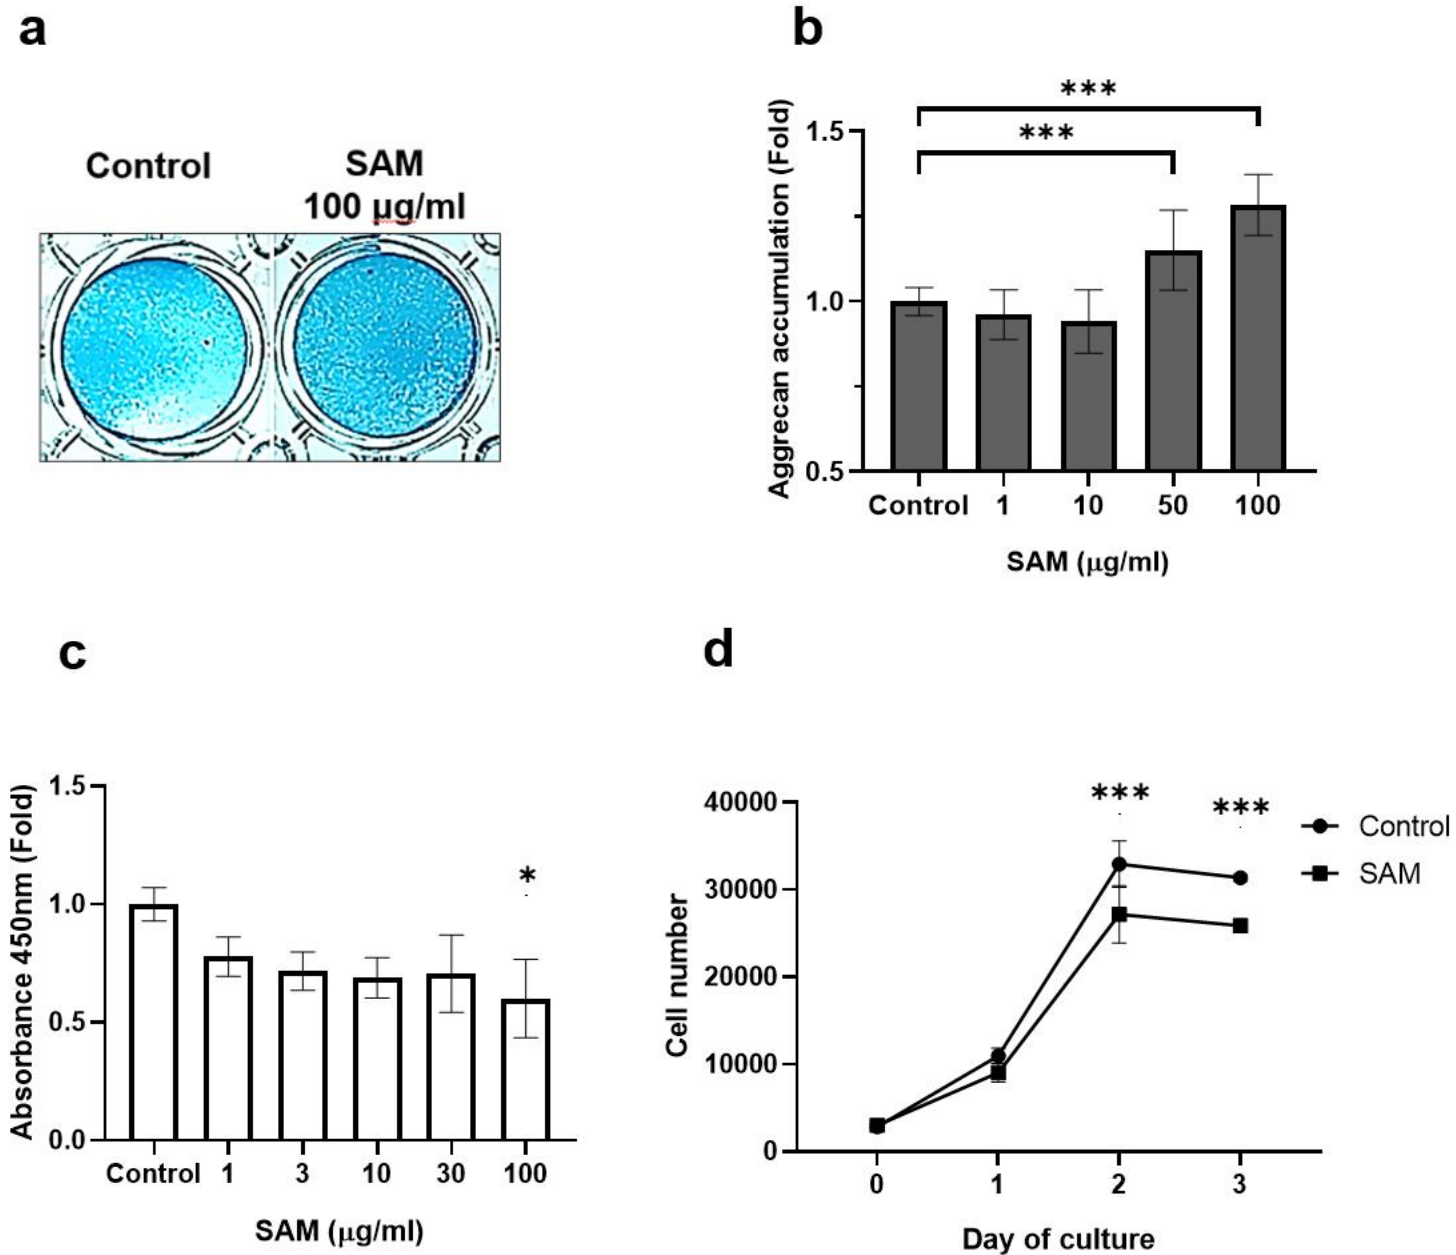

**Supplementary Figure 1. SAM enhances aggrecan production in RCS cells without promoting proliferation.**

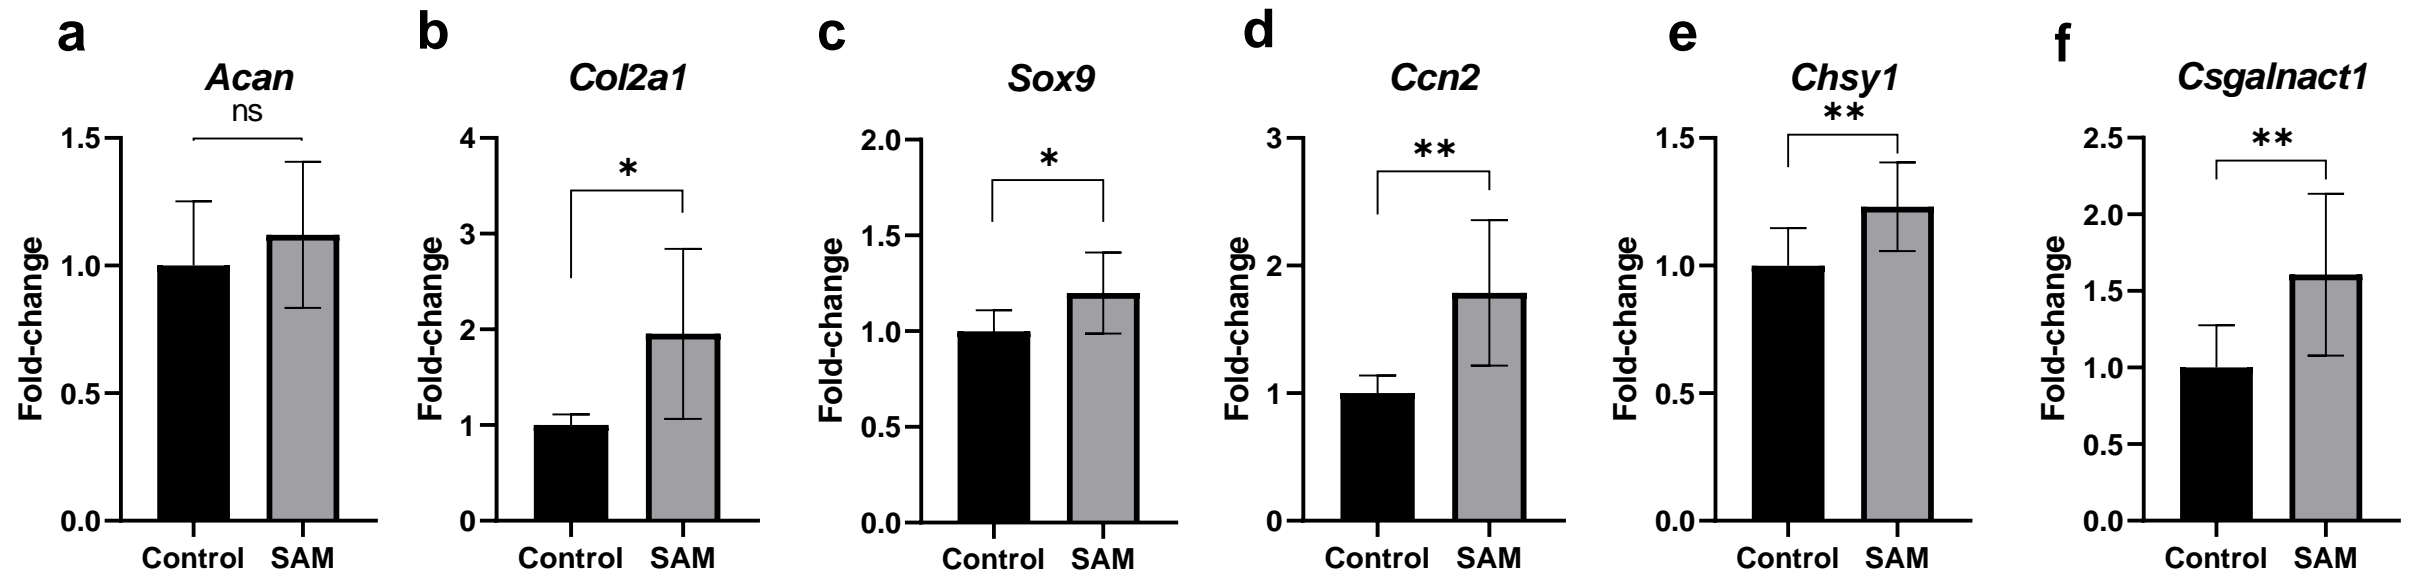

**Supplementary Figure 2. SAM enhanced the gene expression of cartilage-specific markers, chondrogenesis associated factors and enzymes involved in chondroitin sulfate synthesis in RCS cells.**

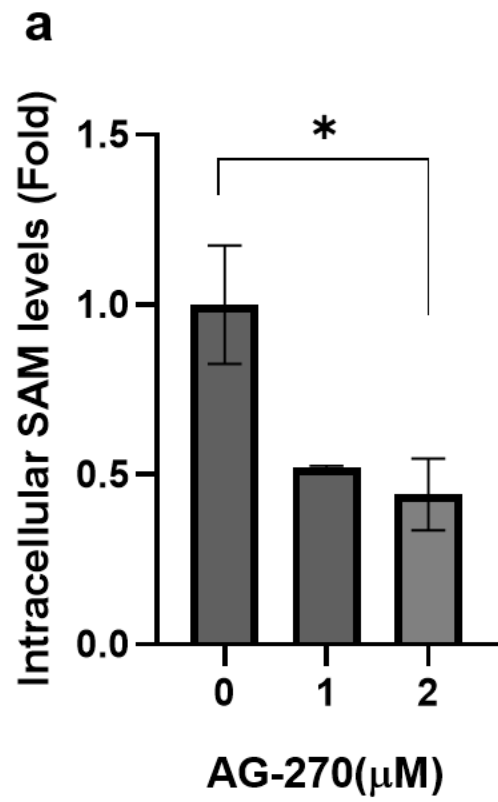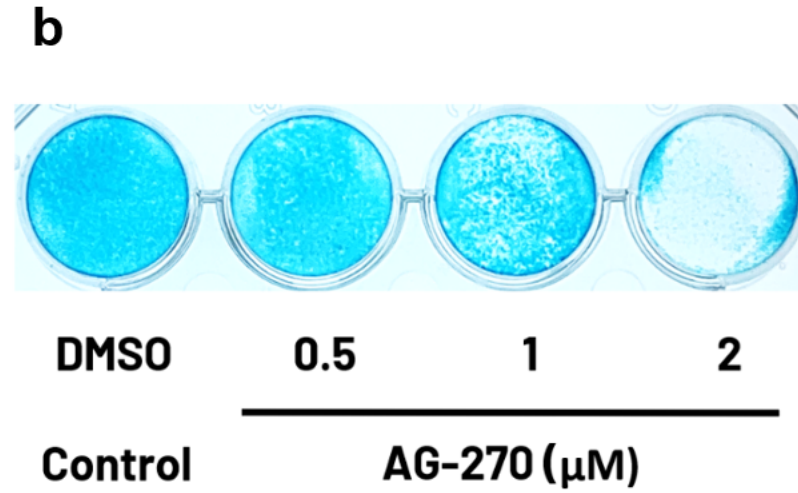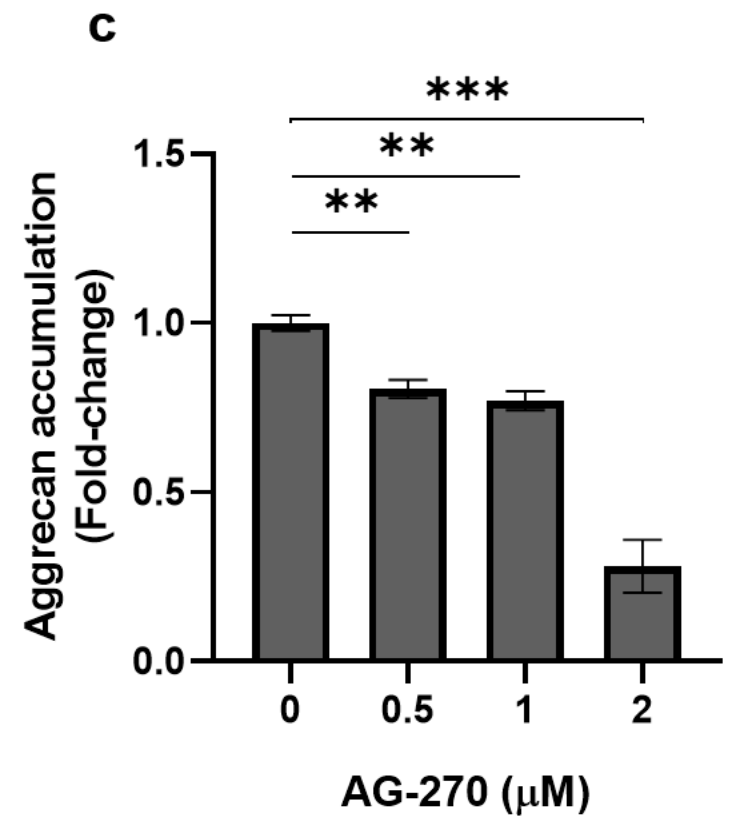

**Supplementary Figure 3. Inhibiting intracellular SAM synthesis suppresses aggrecan accumulation in RCS cells.**

RCS

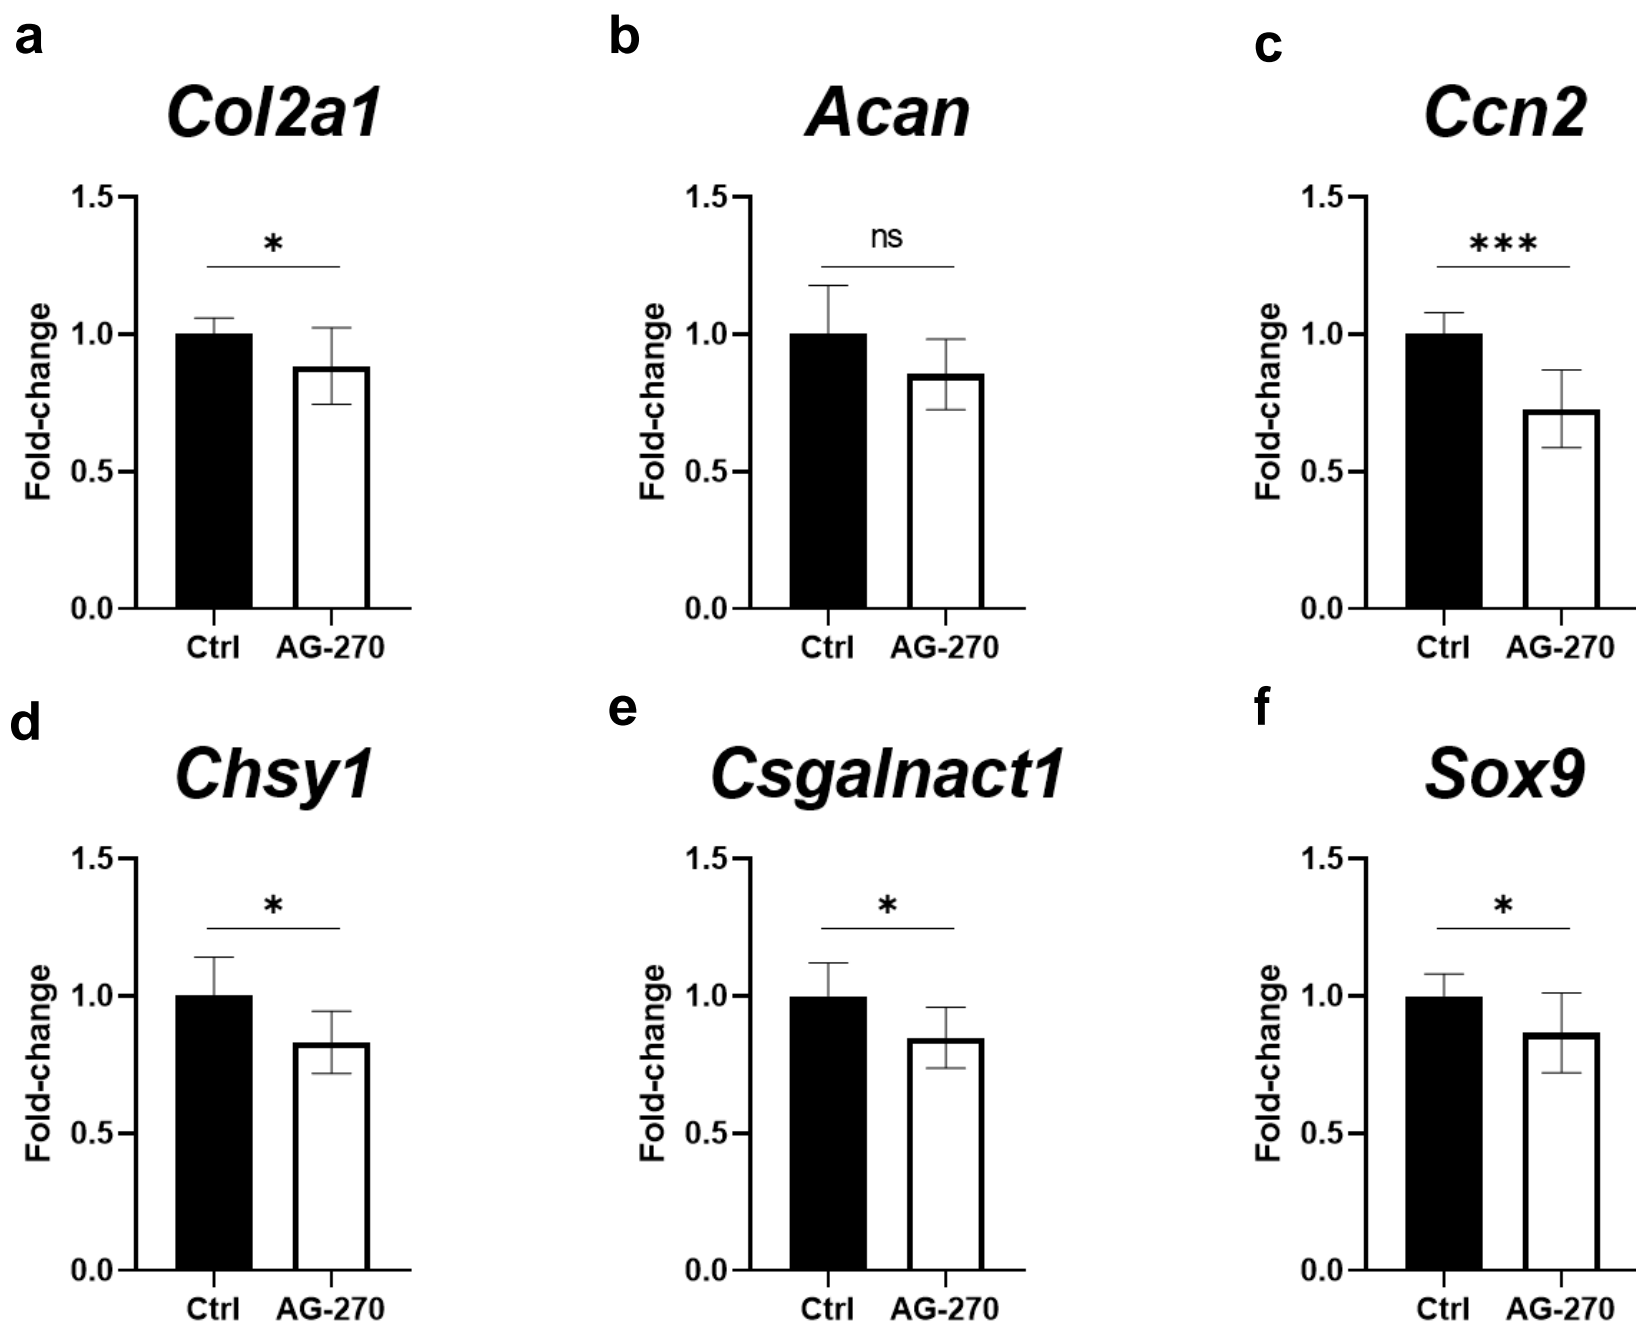

Supplementary Figure 4. Effect of AG-270 on the induction of the gene expression by SAM in RCS cells.

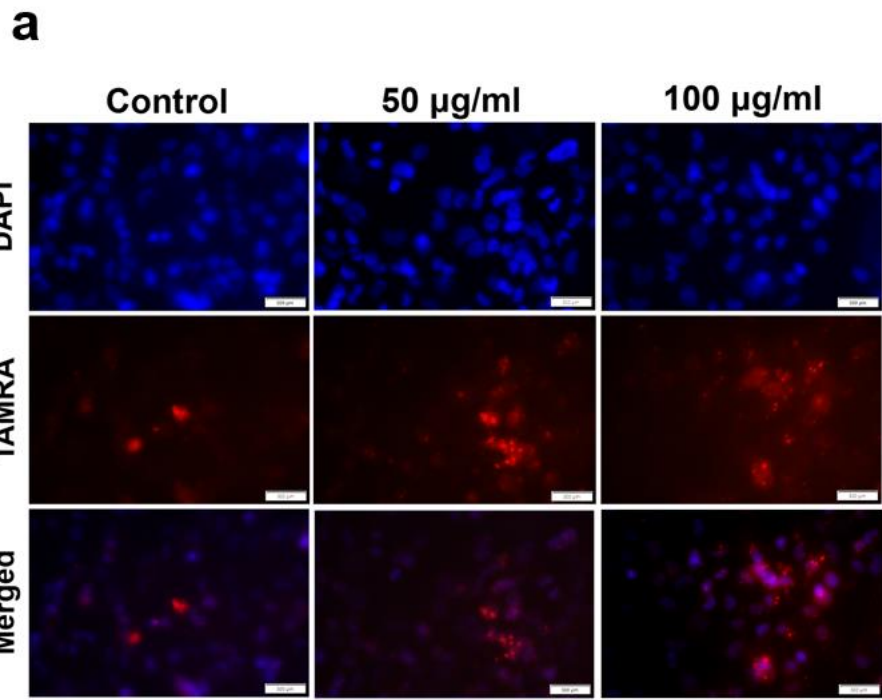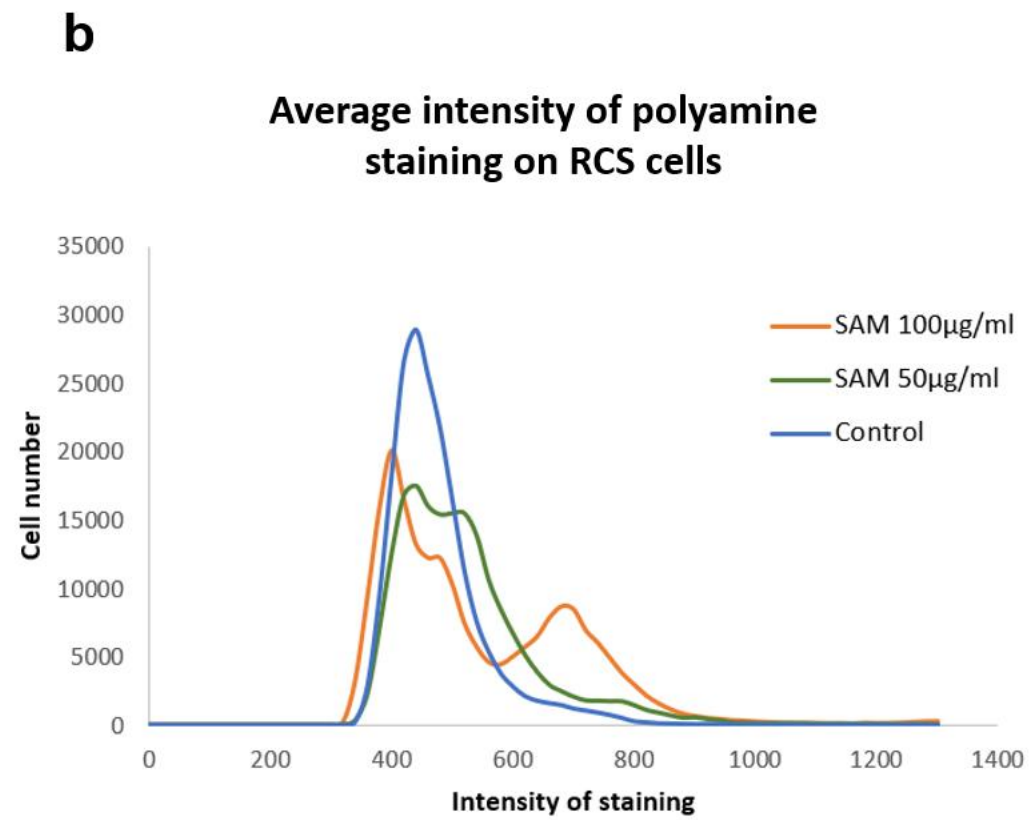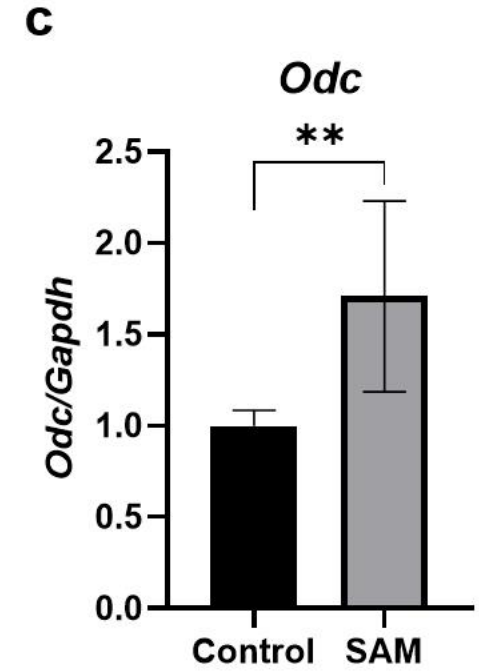

Supplementary Figure 5 (a)-(c). Exogenous SAM promoted polyamine production in the chondrocytic cell line.

**d**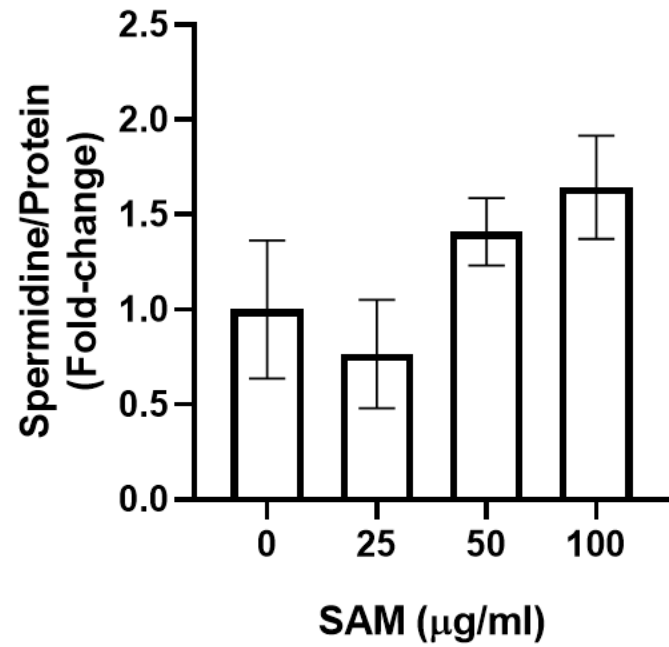**e**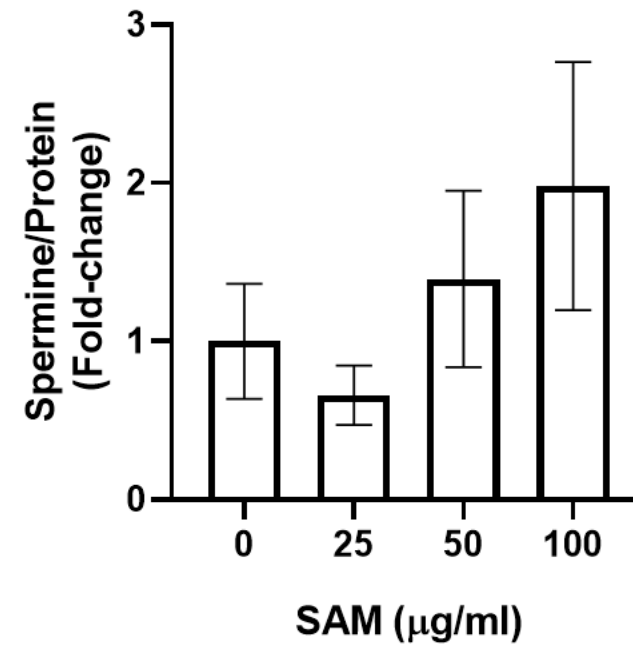

**Supplementary Figure 5 (d)(e)Exogenous SAM promoted polyamine production in the chondrocytic cell line.**

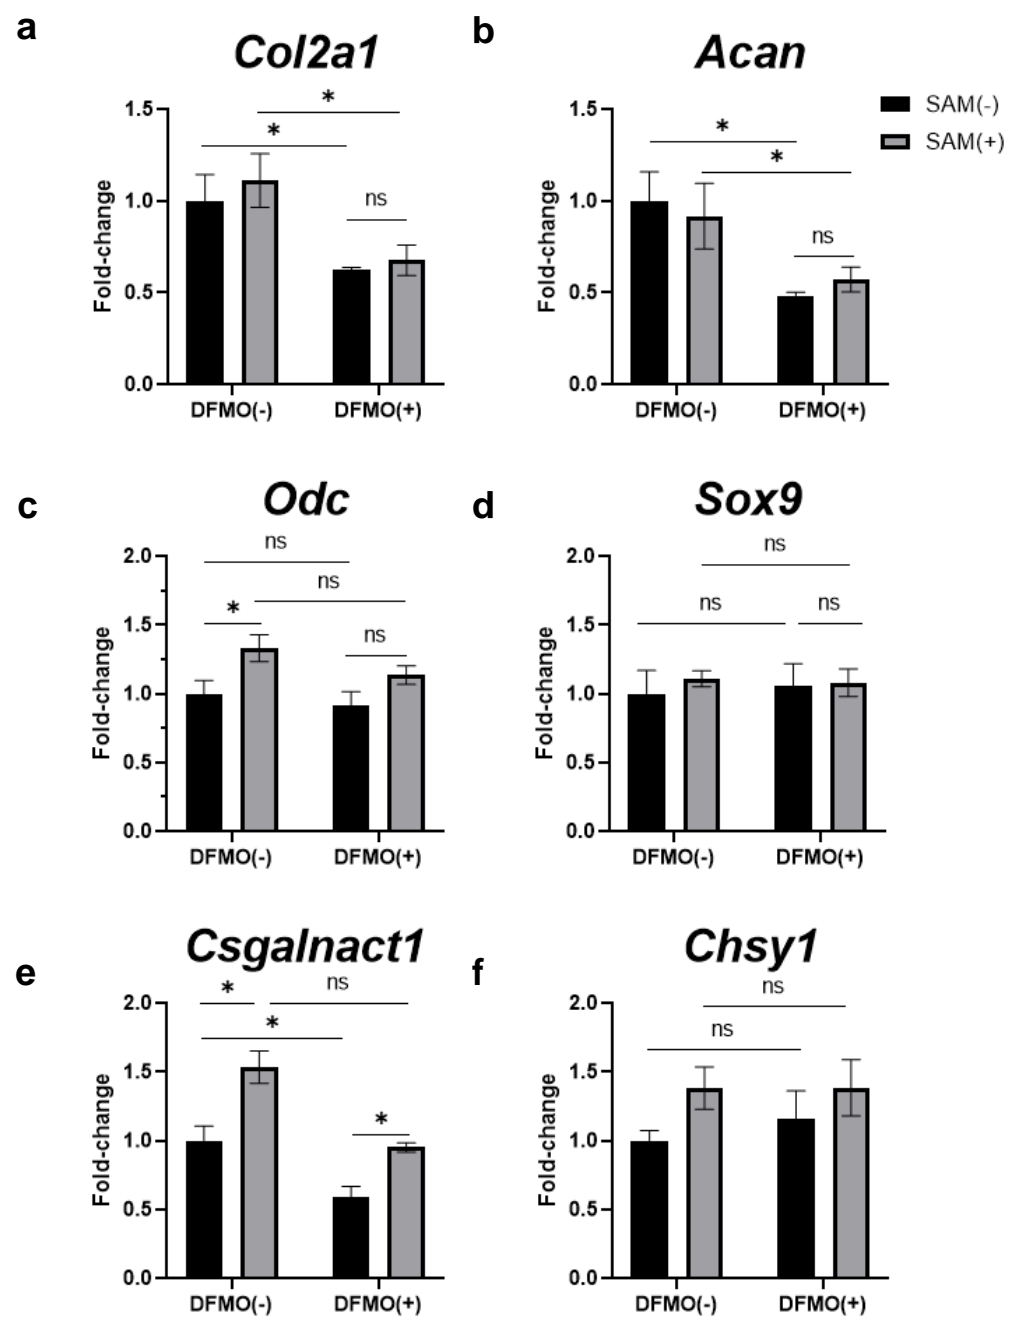

Supplementary Figure 6. Effect of DFMO on the SAM-induced gene expression in RCS cells
